# Supplementary material for: PD-L1 expression is associated with epithelial-mesenchymal transition in head and neck squamous cell carcinoma
Source: PubMed Central journal article supplement (PMC4941285; doi:10.18632/oncotarget.7431), 2016-02-17
Supplement: oncotarget-07-15901-s001.pdf [file oncotarget-07-15901-s001.pdf]

**SUPPLEMENTARY FIGURES AND TABLES**

**A PD-L1 negative**

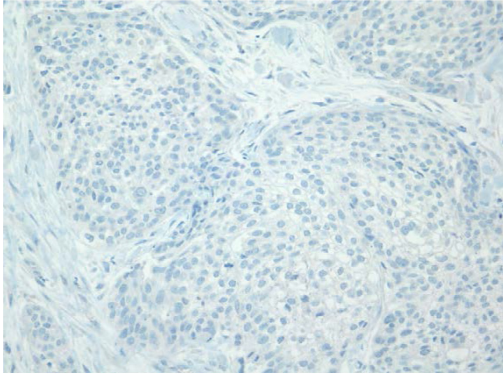

**B PD-L1 1+**

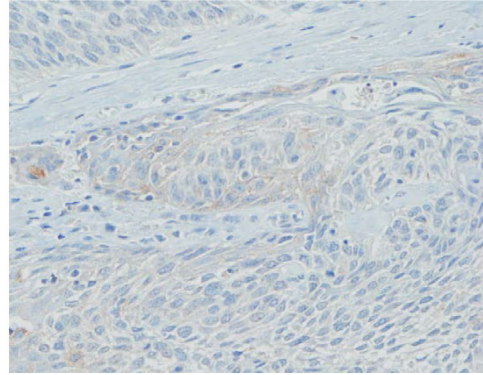

**C PD-L1 2+**

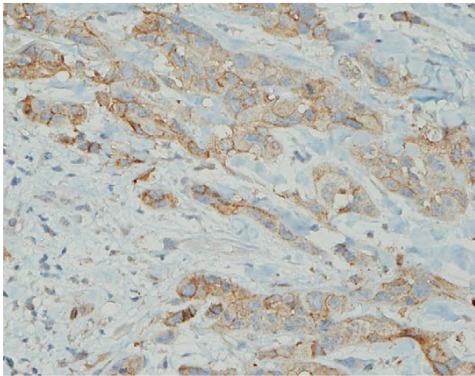

**D PD-L1 3+**

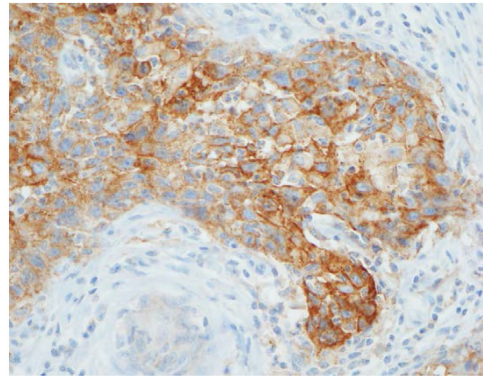

**E p16 positive**

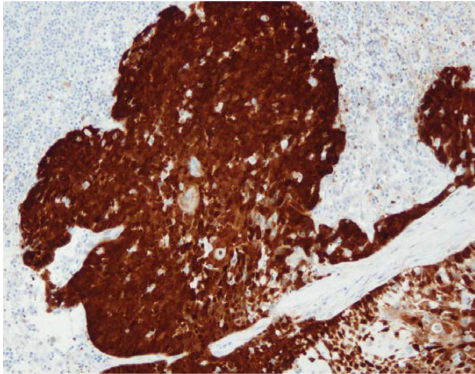

**F E-cadherin high**

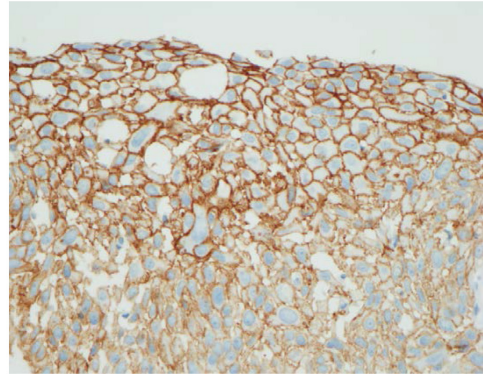

**Supplementary Figure S1: Representative immunohistochemistry stain of PD-L1-negative. A. 1+ B. 2+ C. and 3+ D. (x400), as well as p16-positive E. (x200) and high E-cadherin expression F. (x400)**

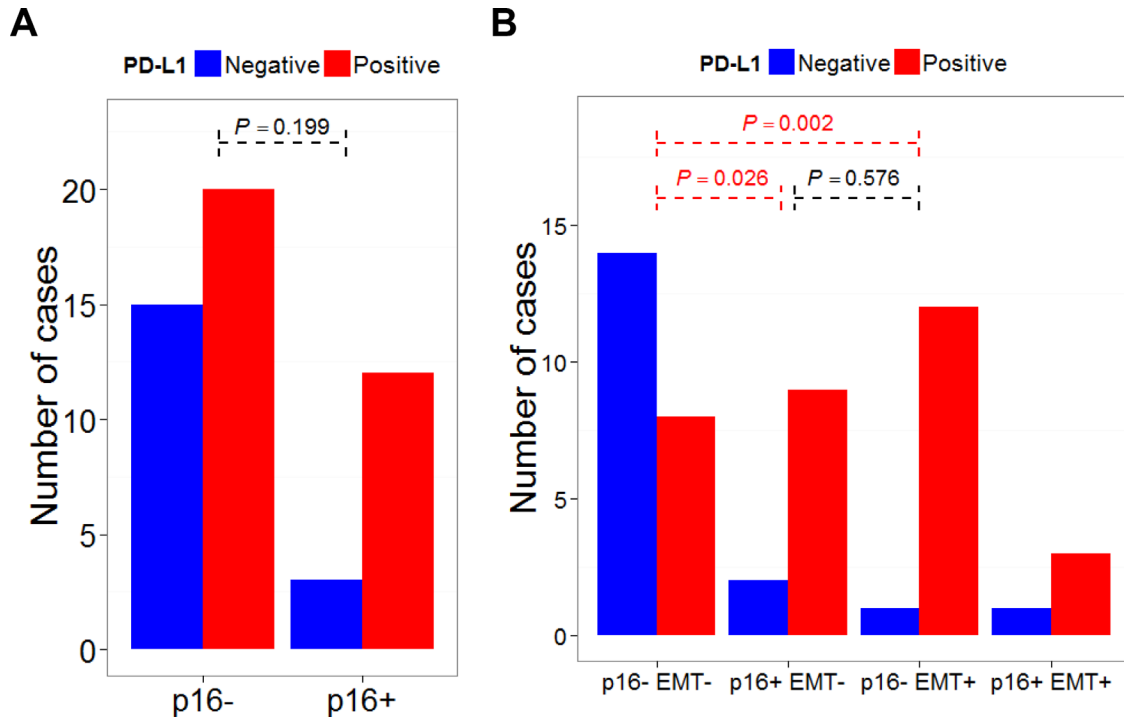

**Supplementary Figure S2: PD-L1 positivity according to p16 and epithelial-mesenchymal transition (EMT) status.** Number of cases with PD-L1 negative (blue bar) and positive (red bar) according to p16 **A.** and p16/EMT status **B.**

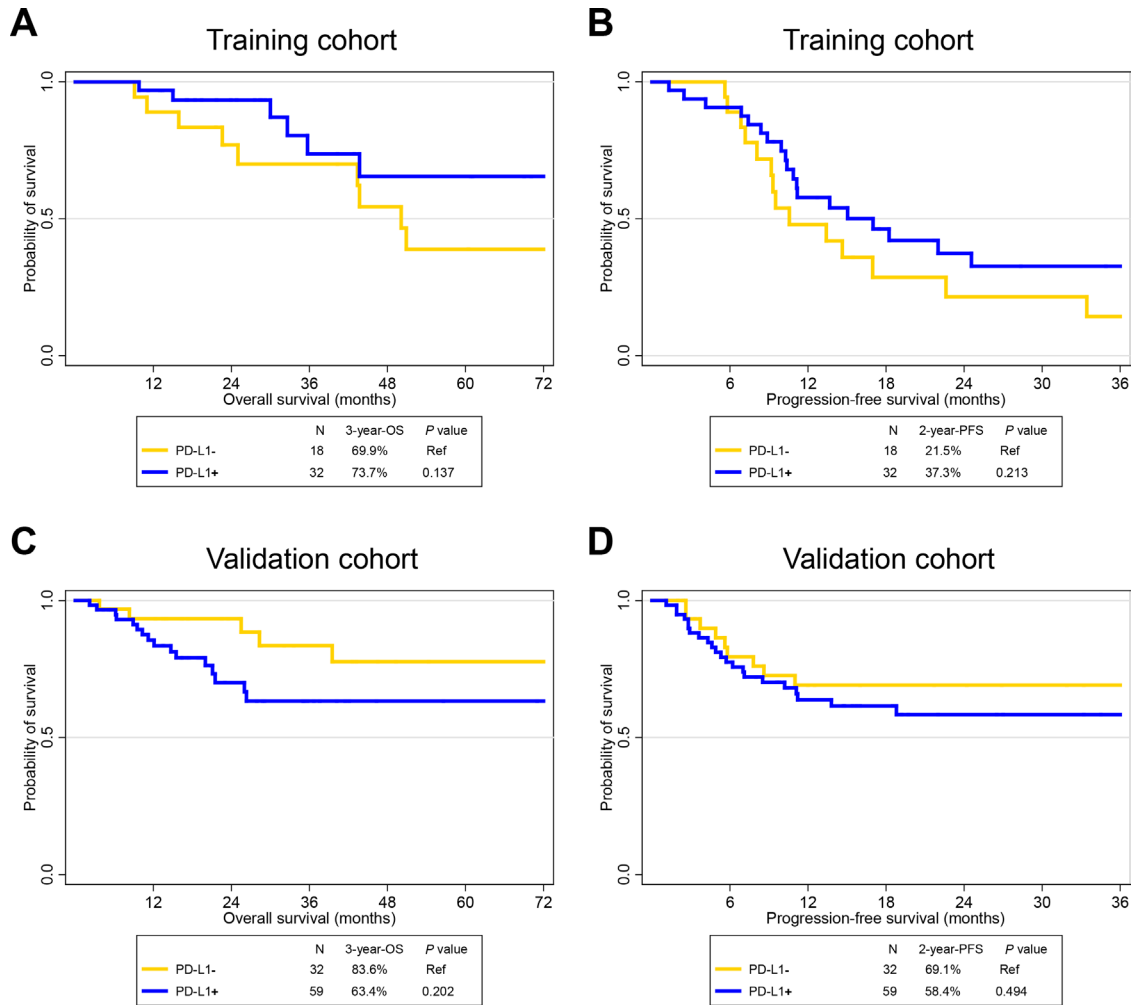

**Supplementary Figure S3: Survival analysis according to PD-L1 in HNSCC patients of training (A, B) and validation cohorts (C, D).** A Kaplan-Meier plot of overall survival (OS; A, C) and progression-free survival (PFS; B, D) according to PD-L1 statuses. Abbreviation: HNSCC, head and neck squamous cell carcinoma; Ref, reference.

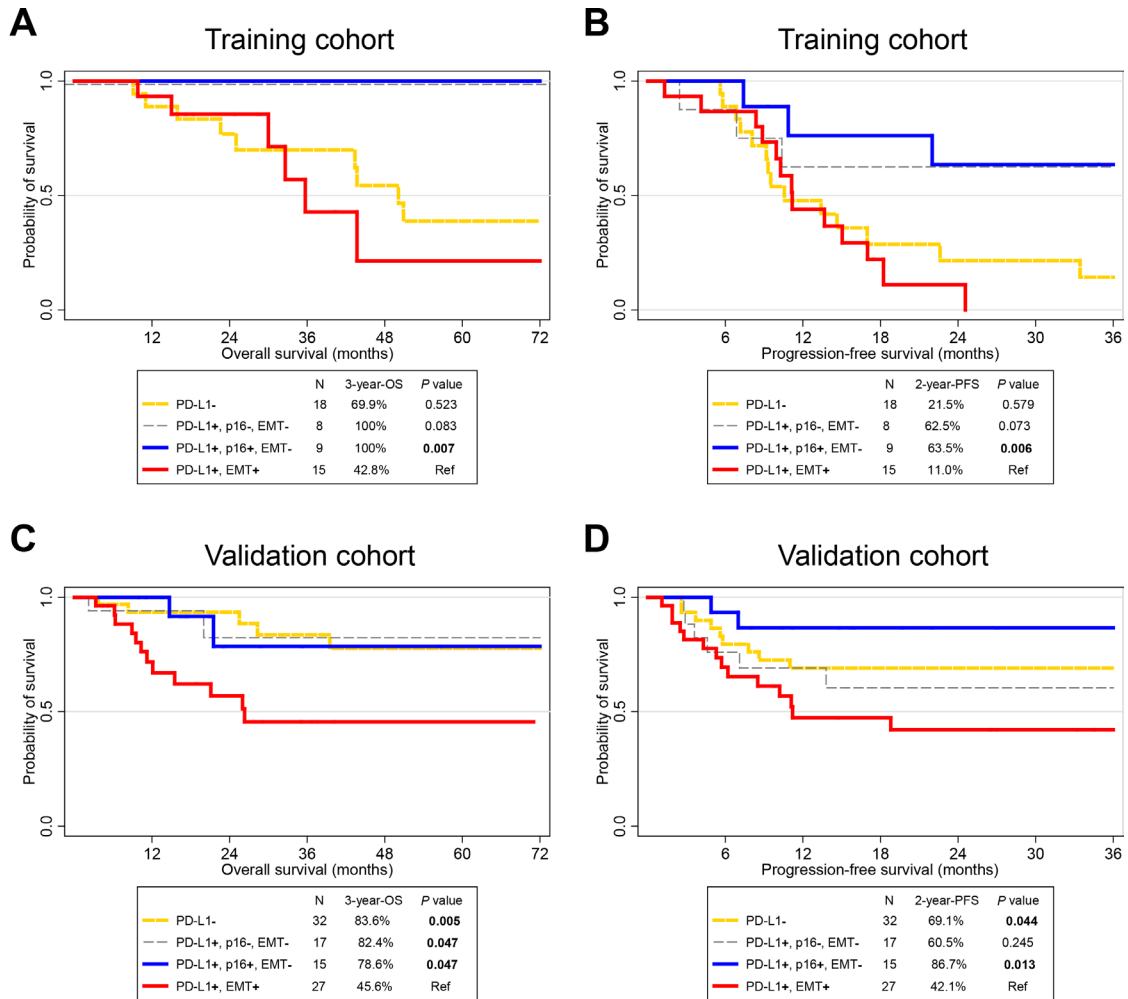

**Supplementary Figure S4: Survival analysis according to PD-L1, p16, and epithelial-mesenchymal transition status in HNSCC patients of training (A, B) and validation cohorts (C, D).** A Kaplan-Meier plot of overall survival (OS; A, C) and progression-free survival (PFS; B, D) according to PD-L1, p16, and epithelial-mesenchymal transition (EMT) status. Abbreviation: HNSCC, head and neck squamous cell carcinoma; Ref, reference.

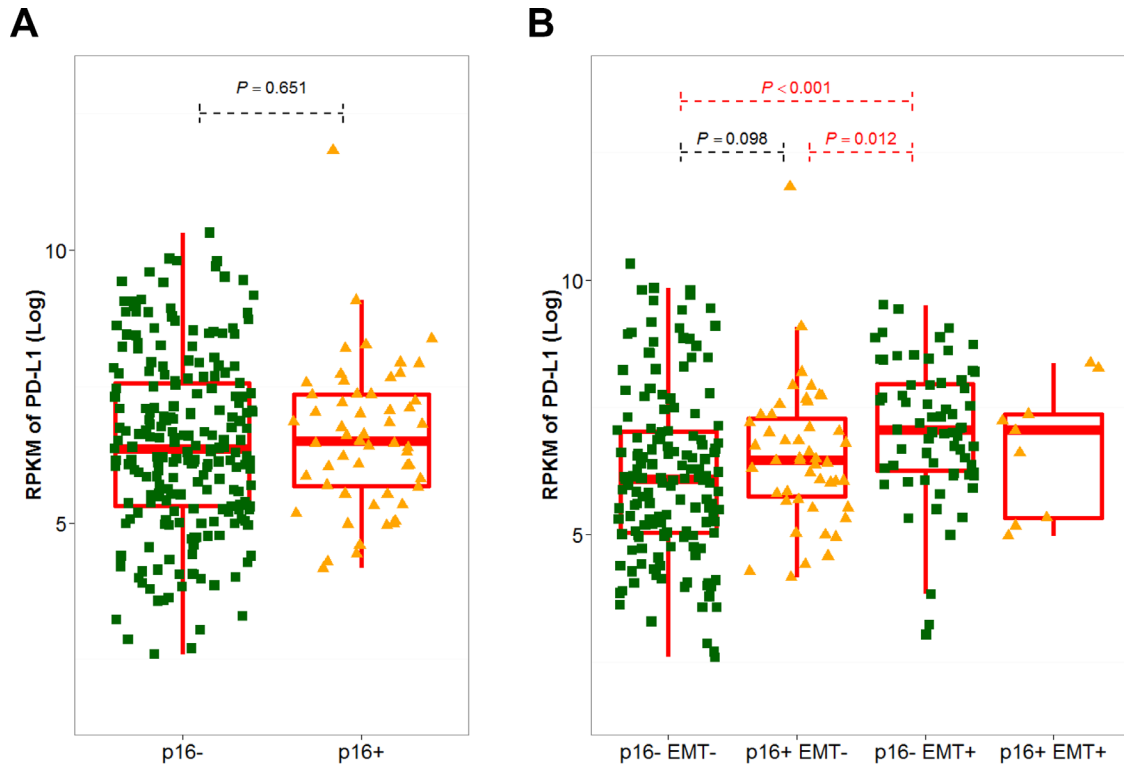

**Supplementary Figure S5: PD-L1 expression according to p16 and EMT status in The Cancer Genome Atlas (TCGA).** PD-L1 expression calculated by Log<sub>2</sub> value of its RPKM is compared according to p16 status **A.** and p16/EMT status **B.**

**Supplementary Table S1: Epithelial-mesenchymal transition (EMT)-associated gene lists**

See Supplementary File 1

Supplementary Table S2: Univariate analysis of factors affecting progression-free survival

|          |                                 | Training cohort  |         |              |         | Validation cohort |         |                  |         |
|----------|---------------------------------|------------------|---------|--------------|---------|-------------------|---------|------------------|---------|
|          |                                 | Univariate       |         | Multivariate |         | Univariate        |         | Multivariate     |         |
|          |                                 | HR (95% CI)      | P value | HR (95% CI)  | P value | HR (95% CI)       | P value | HR (95% CI)      | P value |
| Age      | Continuous                      | 1.02 (0.99-1.05) | 0.092   |              |         | 1.00 (0.97-1.02)  | 0.830   |                  |         |
| Sex      | Female (vs. Male)               | 0.66 (0.28-1.60) | 0.359   |              |         | 1.14 (0.57-2.27)  | 0.718   |                  |         |
| Smoking  | Yes (vs. No)                    | 1.15 (0.58-2.27) | 0.693   |              |         | 0.86 (0.40-1.84)  | 0.698   |                  |         |
| ECOG     | 1 (vs. 0)                       | 0.64 (0.30-1.33) | 0.231   |              |         | 2.73 (1.41-5.29)  | 0.003   | 2.90 (1.49-5.62) | 0.002   |
| Stage    | Continuous                      | 1.19 (0.83-1.71) | 0.336   |              |         | 0.94 (0.70-1.28)  | 0.707   |                  |         |
| Location | Oropharynx (vs. Non-oropharynx) | 0.53 (0.25-1.10) | 0.089   |              |         | 0.60 (0.30-1.21)  | 0.153   |                  |         |
| PD-L1    | Positive (vs. Negative)         | 0.66 (0.34-1.28) | 0.217   |              |         | 1.27 (0.64-2.54)  | 0.496   |                  |         |
| p16      | Positive (vs. Negative)         | 0.48 (0.22-1.04) | 0.062   |              |         | 0.51 (0.24-1.09)  | 0.084   |                  |         |
| EMT      | Positive (vs. Negative)         | 1.99 (0.99-3.99) | 0.051   |              |         | 2.06 (1.06-4.00)  | 0.033   | 2.24 (1.15-4.35) | 0.018   |

Abbreviation: ECOG, Eastern Cooperative Oncology Group performance status; HR, hazard ratio; CI, confidence interval; EMT, epithelial-mesenchymal transition.
